# Supplementary material for: CBF transcription factors involved in the cold response of Camellia japonica (Naidong)
Source: PeerJ journal article supplement (doi:10.7717/peerj.12155), 2021-09-09
Supplement: S1.pdf [file S1.pdf]

Identity=73.96%

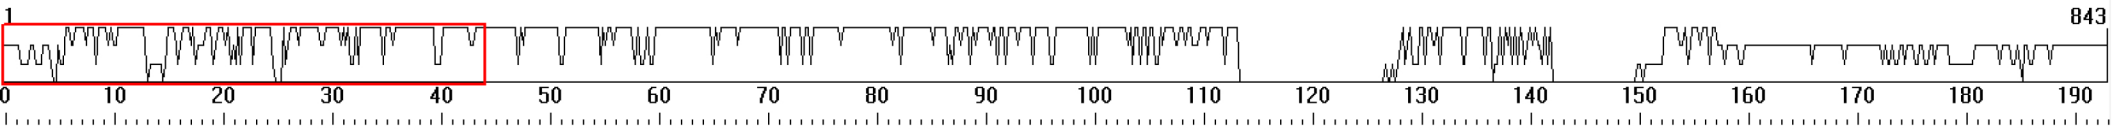

|            |                                                                                                                                                                                                   |     |
|------------|---------------------------------------------------------------------------------------------------------------------------------------------------------------------------------------------------|-----|
| CjCBF1.txt | ATGGATTGCAAGAAAA...ATGTGTTTCTCACTATTCTGATTCACTTCTAGTGGTCAGGTTTCTCATCCAAAGAAATGCGGGAATGCTCATCGGCSTCAGATA...GGGCACTGGTGTCTATCCAGCTCCANTCTTCTGACGAGAGCTTTTGTGGCTTCAAGGAA                             | 194 |
| CjCBF2.txt | .....ATGTGTTTCTCACTATTCTGACCCTTCTTAGT.....TTGCGGTCCGACGACCTCCGGACTCTCCGCGGTCTCAGATT...GTGGCACTGGTGTCTCGCCAGCTCTAGGCTCTCTGACGAGAGCTTTTGTGGCTTCAAGCTGTCCGAAGAAGAGGGAGGGAGGAA                        | 164 |
| CjCBF3.txt | ATGGATTCAACAAAGAAATGAGGTCATTCTTACTATCTAAACCCTTCTAGTGAATCAGTTTCTCTCCAAAGCCCTCGGGAATCTCTATCGGCSTCAGATACTCGCABCACTGGTGTCTCGCCAGCTCTCTTCTCTCTGACGAGAGCTTTTGTGGCTTCAAGGAA                              | 200 |
| CjCBF5.txt | ATGGATTGACATGGAATCGATATGTTTCTCACTTTCTGACCCTTCTAGT.....TTGCGGTCCAAAGAAATGCGGGAATCTCCGCGGTCTCAGATT...GTGGCACTGGTGTCTCGCCAGCTCTCTGCTTCTGACGAGAGCTTTTGTGGCTTCAAGCTGTCCGAAGAAGAGGGAGGGAGGAA            | 188 |
| Consensus  | tg ttct act ttct a cacttctagt ttc tcc a gtc gga t c tcgg gtcagat g gca tgggtctc ccagct c a t ttctgacga gag ttttgttggcttcaag tccgaagaaga ggaggaggaa                                                |     |
|            |                                                                                                                                                                                                   |     |
| CjCBF1.txt | GAAAGTAAAGGAGACTCGGCACCAGTGTACCAGAGTGTCAAGTGGAGAACATCCACACTGGGTCTGCGAAGTGC CGGAGCCAAATAAGAAGTCGAGGATATGGCTCGGTACATTTCCAACTCGGAAATGGCTGGGAGAGCTCAGCAGCTTGGTGCATTGCTTTGAGAAATCGGATGCTGTCTCAATTTGCTG | 394 |
| CjCBF2.txt | GAAAGTCAAGGAGACTCGGCACCAGTGTACCAGAGTGTCAAGTGGAGAACACAGTATATGGGTCTGCGAAGTGC CGGAGCCAAATAAGAAGTCGAGGATATGGCTCGGTACATTTCCAACTCGGAAATGGCTGGGAGAGCTCAGCAGCTTGGTGCATTGCTTTGAGAAATCGGATGCTGTCTCAATTTGCTG | 364 |
| CjCBF3.txt | GAAAGTGAAGGAGACTCGGCACCAGTGTACCAGAGTGTCAAGTGGAGAACATCCACACTGGGTCTGCGAAGTGC CGGAGCCAAATAAGAAGTCGAGGATATGGCTCGGTACATTTCCAACTCGGAAATGGCTGGGAGAGCTCAGCAGCTTGGTGCATTGCTTTGAGAAATCGGATGCTGTCTCAATTTGCTG | 400 |
| CjCBF5.txt | GAAAGTCAAGGAGACTCGGCACCAGTGTACCAGAGTGTCAAGTGGAGAACACAGTAAATGGGTCTGCGAAGTGC CGGAGCCAAATAAGAAGTCGAGGATATGGCTCGGTACATTTCCAACTCGGAAATGGCTGGGAGAGCTCAGCAGCTTGGTGCATTGCTTTGAGAAATCGGATGCTGTCTCAATTTGCTG | 388 |
| Consensus  | gaaagt a ggagactcggcacc gtgtaccgaggtgt a gt gaggaa c a tgggtctgccaagtgcggagcc a taagaag cgaggatatggctcgg ac tttcc ac gggaaatggc gcgagagctcagcagcttgc gc attgctttgaga gtcgg gc tgt t aattt gc g    |     |
|            |                                                                                                                                                                                                   |     |
| CjCBF1.txt | ACTCGGTTTGGAGCTGCCGTTCCGGCTTCATTGAAATCCCAAGGATATTCAAAAGCAACAGCCGAGGCGGCTCAGATTTTCCGCCACCTGTTGGAGGAGAAGAAGGATTTCCAGGTGACCTGGCAAAGCCGAAGAG                                                          | 594 |
| CjCBF2.txt | ATTCGGCTTGGAGCTGCCGTTCCGGCTTCATTGAAATCCCAAGGATATTAAAGAGCGGCGAGCCGAGGCGGCAAGAGCTTCCGGCCATCCTTG.....CTACCTAGAGCTTCTGGTGACCTAAACAAAGCCGGA...G                                                        | 498 |
| CjCBF3.txt | ACTCGGTTTGGAGCTGCCGTTCCGGCTTCATTGAAATCCCAAGGATATTCAAAAGCAACAGCCGAGGCGGCAAGAGCTTCCGCCACCTGTTGGAGGAGAAGAAGGATTTCCAGGTGACCTGGCAAAGCCGAAGAG                                                           | 540 |
| CjCBF5.txt | ATTCGGTTTGGAGCTGCCGTTCCGGCTTCATTGAAATCCCAAGGATATTCAAAAGCGCCGAGGCGGCAAGAGCTTCCGCCACCTGTTGGAGGAGAAGAAGGATTTCCAGGTGACCTGGCAAAGCCGGA...G                                                              | 522 |
| Consensus  | a tcgg ttgga gctgcc ttccgcttcattg a cccaaggatt a aa gc gc c gagg gc ga gtt cggcca cgttg g c ga gt c ggtgacct caaagc ga g                                                                          |     |
|            |                                                                                                                                                                                                   |     |
| CjCBF1.txt | GATCGCAATTCAACCAATGCAACTACAACAGCAACTGAAACTGCGACTGAGACACAATGCCGGAGAAATTTGCTTTACATGACGACGAGGCAATTTTCGGGATGCCGGGATTGCTTGCAACATGGCAGAAGGTTGATGCTACCTCCTCCACCGCTCACTCTGAAGGAGAGACTGGTACCAGGTTGATGAGC   | 794 |
| CjCBF2.txt | AATGTCGCGGCAAAATCC.....C.....GGAGAAATATTTACATTGA.....GGAGAAATATTTACATTGA.....GGAGAAATATTTACATTGA.....GGAGAAATATTTACATTGA.....GGTGTGACGT                                                           | 540 |
| CjCBF3.txt | GATCGCAATTCAACCAATGCAACTACAACAGCAACTGAAACTGCGACTGAGACACAATGCCGGAGAAATTTGCTTTACATGACGACGAGGCAATTTTCGGGATGCCGGGATTGCTTGCAACATGGCAGAAGGTTGATGCTACCTCCTCCACCGCTCACTCTGAAGGAGAGACTGGTACCAGGTTGATGAGC   | 698 |
| CjCBF5.txt | AATGTCGCGGCAAAATCC.....C.....GGAGAAATATTTACATTGA.....GGAGAAATATTTACATTGA.....GGAGAAATATTTACATTGA.....GGAGAAATATTTACATTGA.....GGTGTGACGT                                                           | 677 |
| Consensus  | a g g c g c g c ggagaa t ttt cat ga                                                                                                                                                               |     |
|            |                                                                                                                                                                                                   |     |
| CjCBF1.txt | GGAACCTGGTGCAGCGTGTCACTCTGGAGCTTCTCAATTTA                                                                                                                                                         | 836 |
| CjCBF2.txt | .....GGAAGTTGATGCTGACGTGTCCTCTGGAGCTTCTCAATTTA                                                                                                                                                    | 540 |
| CjCBF3.txt | GGAAGTTGATGCTGACGTGTCCTCTGGAGCTTCTCAATTTA                                                                                                                                                         | 740 |
| CjCBF5.txt | GGAAGCTTCTGATGACGTGGCACTCTGGAGCTTCTCAATTTA                                                                                                                                                        | 719 |
| Consensus  |                                                                                                                                                                                                   |     |
