# Supplementary material for: CBF transcription factors involved in the cold response of Camellia japonica (Naidong)
Source: PeerJ. 2021 Sep 9;9:e12155. doi: 10.7717/peerj.12155 (PMC8435204; doi:10.7717/peerj.12155)
Supplement: Supplemental Information 4 [file peerj-09-12155-s004.xlsx]

## Sheet: Sheet1
PlantCARE_4476			motif_sequence	2	4	+	organism	short_function
PlantCARE_4476			motif_sequence	59	4	-	organism	short_function
PlantCARE_4476			motif_sequence	549	4	+	organism	short_function
PlantCARE_4476			motif_sequence	695	4	-	organism	short_function
PlantCARE_4476			motif_sequence	761	4	-	organism	short_function
PlantCARE_4476			motif_sequence	823	4	+	organism	short_function
PlantCARE_4476			motif_sequence	934	4	+	organism	short_function
PlantCARE_4476			motif_sequence	955	4	-	organism	short_function
PlantCARE_4476			motif_sequence	1212	4	-	organism	short_function
PlantCARE_4476	TC-rich repeats	TC-rich repeats	GTTTTCTTAC	255	9	+	Nicotiana tabacum	cis-acting element involved in defense and stress responsiveness
PlantCARE_4476	MYB	MYB	CAACCA	389	6	+	Arabidopsis thaliana
PlantCARE_4476	AE-box	AE-box	AGAAACAA	226	8	-	Arabidopsis thaliana	part of a module for light response
PlantCARE_4476	AE-box	CGTCA-motif	AGAAACTT	1239	8	+	Arabidopsis thaliana	part of a module for light response								part of a module for light response
PlantCARE_4476	CGTCA-motif	AT~TATA-box	CGTCA	731	5	+	Hordeum vulgare	cis-acting regulatory element involved in the MeJA-responsiveness								light responsive element
PlantCARE_4476	CGTCA-motif	GT1-motif	CGTCA	1059	5	+	Hordeum vulgare	cis-acting regulatory element involved in the MeJA-responsiveness								part of a conserved DNA module involved in light responsiveness
PlantCARE_4476	CGTCA-motif	CAAT-box	CGTCA	1116	5	-	Hordeum vulgare	cis-acting regulatory element involved in the MeJA-responsiveness								cis-acting regulatory element involved in light responsiveness
PlantCARE_4476	CGTCA-motif	CARE	CGTCA	1202	5	-	Hordeum vulgare	cis-acting regulatory element involved in the MeJA-responsiveness								part of a light responsive element
PlantCARE_4476	AT~TATA-box	Unnamed__4	TATATA	339	6	+	Arabidopsis thaliana
PlantCARE_4476	AT~TATA-box	ABRE	TATATA	415	6	+	Arabidopsis thaliana
PlantCARE_4476	AT~TATA-box	Box 4	TATATA	417	6	+	Arabidopsis thaliana
PlantCARE_4476	AT~TATA-box	Unnamed__1	TATATA	796	6	-	Arabidopsis thaliana
PlantCARE_4476	AT~TATA-box	WUN-motif	TATATAAA	857	8	-	Arabidopsis thaliana
PlantCARE_4476	AT~TATA-box	A-box	TATATA	859	6	-	Arabidopsis thaliana
PlantCARE_4476	AT~TATA-box	STRE	TATATA	897	6	-	Arabidopsis thaliana
PlantCARE_4476	AT~TATA-box	as-1	TATATA	1232	6	-	Arabidopsis thaliana
PlantCARE_4476	AT~TATA-box	GCN4_motif	TATATA	1234	6	-	Arabidopsis thaliana
PlantCARE_4476	GT1-motif	ERE	GTGTGTGAA	1081	9	-	Solanum tuberosum	light responsive element
PlantCARE_4476	CAAT-box	CCGTCC motif	CAAT	36	4	+	Nicotiana glutinosa
PlantCARE_4476	CAAT-box	Myc	CAAT	52	4	-	Nicotiana glutinosa
PlantCARE_4476	CAAT-box	ATCT-motif	CAAT	118	4	+	Nicotiana glutinosa
PlantCARE_4476	CAAT-box	CCAAT-box	CAAT	336	4	+	Nicotiana glutinosa
PlantCARE_4476	CAAT-box	ATC-motif	CAAAT	361	5	-	Pisum sativum	common cis-acting element in promoter and enhancer regions
PlantCARE_4476	CAAT-box	TGACG-motif	CAAT	367	4	-	Nicotiana glutinosa
PlantCARE_4476	CAAT-box	TCT-motif	CAAAT	487	5	+	Pisum sativum	common cis-acting element in promoter and enhancer regions
PlantCARE_4476	CAAT-box	TATA	CAAT	618	4	-	Nicotiana glutinosa
PlantCARE_4476	CAAT-box	CCGTCC-box	CAAAT	636	5	-	Pisum sativum	common cis-acting element in promoter and enhancer regions
PlantCARE_4476	CAAT-box	G-box	CAAT	660	4	-	Nicotiana glutinosa
PlantCARE_4476	CAAT-box	TATA-box	CAAAT	670	5	-	Pisum sativum	common cis-acting element in promoter and enhancer regions
PlantCARE_4476	CAAT-box	MYB recognition site	CAAT	715	4	+	Nicotiana glutinosa
PlantCARE_4476	CAAT-box	GA-motif	CAAT	737	4	+	Nicotiana glutinosa
PlantCARE_4476	CAAT-box		CAAT	778	4	+	Nicotiana glutinosa
PlantCARE_4476	CAAT-box		CCCAATTT	964	8	-	Arabidopsis thaliana	common cis-acting element in promoter and enhancer regions
PlantCARE_4476	CAAT-box		CCAAT	966	5	-	Arabidopsis thaliana	common cis-acting element in promoter and enhancer regions
PlantCARE_4476	CAAT-box		CAAAT	986	5	+	Pisum sativum	common cis-acting element in promoter and enhancer regions
PlantCARE_4476	CAAT-box		CAAT	991	4	+	Nicotiana glutinosa
PlantCARE_4476	CAAT-box		CAAAT	1199	5	-	Pisum sativum	common cis-acting element in promoter and enhancer regions
PlantCARE_4476	CAAT-box		CCAAT	1221	5	+	Arabidopsis thaliana	common cis-acting element in promoter and enhancer regions
PlantCARE_4476	CAAT-box		CAAT	1222	4	+	Nicotiana glutinosa
PlantCARE_4476	CARE		CAACTCAC	1144	8	+	Oryza sativa
PlantCARE_4476	Unnamed__4		CTCC	232	4	+	Petroselinum hortense
PlantCARE_4476	Unnamed__4		CTCC	458	4	-	Petroselinum hortense
PlantCARE_4476	Unnamed__4		CTCC	761	4	-	Petroselinum hortense
PlantCARE_4476	Unnamed__4		CTCC	809	4	-	Petroselinum hortense
PlantCARE_4476	ABRE		ACGTG	1106	5	-	Arabidopsis thaliana	cis-acting element involved in the abscisic acid responsiveness
PlantCARE_4476	Box 4		ATTAAT	48	6	+	Petroselinum crispum	part of a conserved DNA module involved in light responsiveness
PlantCARE_4476	Box 4		ATTAAT	1037	6	-	Petroselinum crispum	part of a conserved DNA module involved in light responsiveness
PlantCARE_4476	Unnamed__1		CGTGG	749	5	-	Zea mays
PlantCARE_4476	Unnamed__1		CGTGG	1064	5	-	Zea mays
PlantCARE_4476	WUN-motif		AAATTACTA	525	9	-	Nicotiana glutinosa
PlantCARE_4476	WUN-motif		AAATTACT	526	8	-	Nicotiana glutinosa
PlantCARE_4476	A-box		CCGTCC	1169	6	+	Petroselinum crispum	cis-acting regulatory element
PlantCARE_4476	STRE		AGGGG	512	5	-	Arabidopsis thaliana
PlantCARE_4476	STRE		AGGGG	537	5	-	Arabidopsis thaliana
PlantCARE_4476	as-1		TGACG	731	5	-	Arabidopsis thaliana
PlantCARE_4476	as-1		TGACG	1059	5	-	Arabidopsis thaliana
PlantCARE_4476	as-1		TGACG	1116	5	+	Arabidopsis thaliana
PlantCARE_4476	as-1		TGACG	1202	5	+	Arabidopsis thaliana
PlantCARE_4476	GCN4_motif		TGAGTCA	722	7	-	Oryza sativa	cis-regulatory element involved in endosperm expression
PlantCARE_4476	ERE		ATTTTAAA	835	8	+	Nicotiana glutinos
PlantCARE_4476	CCGTCC motif		CCGTCC	1169	6	+	Nicotiana tabacum
PlantCARE_4476	Myc		TCTCTTA	285	7	-	Arabidopsis thaliana
PlantCARE_4476	ATCT-motif		AATCTAATCC	86	9	-	Pisum sativum	part of a conserved DNA module involved in light responsiveness
PlantCARE_4476	CCAAT-box		CAACGG	707	6	+	Hordeum vulgare	MYBHv1 binding site
PlantCARE_4476	ATC-motif		TGCTATCCA	743	9	+	Pisum sativum	part of a conserved DNA module involved in light responsiveness
PlantCARE_4476	TGACG-motif		TGACG	731	5	-	Hordeum vulgare	cis-acting regulatory element involved in the MeJA-responsiveness
PlantCARE_4476	TGACG-motif		TGACG	1059	5	-	Hordeum vulgare	cis-acting regulatory element involved in the MeJA-responsiveness
PlantCARE_4476	TGACG-motif		TGACG	1116	5	+	Hordeum vulgare	cis-acting regulatory element involved in the MeJA-responsiveness
PlantCARE_4476	TGACG-motif		TGACG	1202	5	+	Hordeum vulgare	cis-acting regulatory element involved in the MeJA-responsiveness
PlantCARE_4476	TCT-motif		TCTTAC	327	6	+	Arabidopsis thaliana	part of a light responsive element
PlantCARE_4476	MYC		CATGTG	242	6	-	Arabidopsis thaliana
PlantCARE_4476	MYC		CATGTG	554	6	+	Arabidopsis thaliana
PlantCARE_4476	TATA		TATAAAAT	855	8	-	Arabidopsis thaliana
PlantCARE_4476	TATA		TATAAAAT	899	8	+	Arabidopsis thaliana
PlantCARE_4476	CCGTCC-box		CCGTCC	1169	6	+	Petroselinum hortense
PlantCARE_4476	G-box		CACGTC	1106	6	+	Zea mays	cis-acting regulatory element involved in light responsiveness
PlantCARE_4476	TATA-box		TATA	178	4	+	Arabidopsis thaliana	core promoter element around -30 of transcription start
PlantCARE_4476	TATA-box		ATTATA	184	6	+	Brassica napus	core promoter element around -30 of transcription start
PlantCARE_4476	TATA-box		TATAA	185	5	-	Arabidopsis thaliana	core promoter element around -30 of transcription start
PlantCARE_4476	TATA-box		TATA	186	4	+	Arabidopsis thaliana	core promoter element around -30 of transcription start
PlantCARE_4476	TATA-box		TATA	195	4	+	Arabidopsis thaliana	core promoter element around -30 of transcription start
PlantCARE_4476	TATA-box		ATATAT	338	6	+	Brassica napus	core promoter element around -30 of transcription start
PlantCARE_4476	TATA-box		TATATA	339	6	+	Arabidopsis thaliana	core promoter element around -30 of transcription start
PlantCARE_4476	TATA-box		TATA	341	4	+	Arabidopsis thaliana	core promoter element around -30 of transcription start
PlantCARE_4476	TATA-box		TATA	384	4	+	Arabidopsis thaliana	core promoter element around -30 of transcription start
PlantCARE_4476	TATA-box		ATATAA	398	6	+	Brassica oleracea	core promoter element around -30 of transcription start
PlantCARE_4476	TATA-box		TATA	399	4	+	Arabidopsis thaliana	core promoter element around -30 of transcription start
PlantCARE_4476	TATA-box		ATATAT	414	6	+	Brassica napus	core promoter element around -30 of transcription start
PlantCARE_4476	TATA-box		TATATA	415	6	+	Arabidopsis thaliana	core promoter element around -30 of transcription start
PlantCARE_4476	TATA-box		ATATAT	416	6	+	Brassica napus	core promoter element around -30 of transcription start
PlantCARE_4476	TATA-box		TATATA	417	6	+	Arabidopsis thaliana	core promoter element around -30 of transcription start
PlantCARE_4476	TATA-box		TATA	419	4	+	Arabidopsis thaliana	core promoter element around -30 of transcription start
PlantCARE_4476	TATA-box		ATATAT	451	6	+	Brassica napus	core promoter element around -30 of transcription start
PlantCARE_4476	TATA-box		TATA	452	4	+	Arabidopsis thaliana	core promoter element around -30 of transcription start
PlantCARE_4476	TATA-box		ATTATA	497	6	+	Brassica napus	core promoter element around -30 of transcription start
PlantCARE_4476	TATA-box		TATAA	498	5	-	Arabidopsis thaliana	core promoter element around -30 of transcription start
PlantCARE_4476	TATA-box		TATA	499	4	+	Arabidopsis thaliana	core promoter element around -30 of transcription start
PlantCARE_4476	TATA-box		TATACA	518	6	-	Helianthus annuus	core promoter element around -30 of transcription start
PlantCARE_4476	TATA-box		TATA	520	4	+	Arabidopsis thaliana	core promoter element around -30 of transcription start
PlantCARE_4476	TATA-box		TATA	656	4	-	Arabidopsis thaliana	core promoter element around -30 of transcription start
PlantCARE_4476	TATA-box		ATATAT	795	6	-	Brassica napus	core promoter element around -30 of transcription start
PlantCARE_4476	TATA-box		TATATA	796	6	-	Arabidopsis thaliana	core promoter element around -30 of transcription start
PlantCARE_4476	TATA-box		ATATAA	797	6	+	Brassica oleracea	core promoter element around -30 of transcription start
PlantCARE_4476	TATA-box		TATA	798	4	-	Arabidopsis thaliana	core promoter element around -30 of transcription start
PlantCARE_4476	TATA-box		TATTTAAA	837	8	-	Arabidopsis thaliana	core promoter element around -30 of transcription start
PlantCARE_4476	TATA-box		TATAAAA	856	7	-	Pisum sativum	core promoter element around -30 of transcription start
PlantCARE_4476	TATA-box		TATAAA	857	6	-	Helianthus annuus	core promoter element around -30 of transcription start
PlantCARE_4476	TATA-box		TATATAA	858	7	-	Arabidopsis thaliana	core promoter element around -30 of transcription start
PlantCARE_4476	TATA-box		TATATA	859	6	-	Arabidopsis thaliana	core promoter element around -30 of transcription start
PlantCARE_4476	TATA-box		ATATAA	860	6	+	Brassica oleracea	core promoter element around -30 of transcription start
PlantCARE_4476	TATA-box		TATA	861	4	-	Arabidopsis thaliana	core promoter element around -30 of transcription start
PlantCARE_4476	TATA-box		ATTATA	895	6	+	Brassica napus	core promoter element around -30 of transcription start
PlantCARE_4476	TATA-box		TATATAA	896	7	-	Arabidopsis thaliana	core promoter element around -30 of transcription start
PlantCARE_4476	TATA-box		TATATA	897	6	-	Arabidopsis thaliana	core promoter element around -30 of transcription start
PlantCARE_4476	TATA-box		ATATAA	898	6	+	Brassica oleracea	core promoter element around -30 of transcription start
PlantCARE_4476	TATA-box		TATA	899	4	-	Arabidopsis thaliana	core promoter element around -30 of transcription start
PlantCARE_4476	TATA-box		TACAAAA	937	7	+	Oryza sativa	core promoter element around -30 of transcription start
PlantCARE_4476	TATA-box		TATATA	1232	6	-	Arabidopsis thaliana	core promoter element around -30 of transcription start
PlantCARE_4476	TATA-box		ATATAT	1233	6	-	Brassica napus	core promoter element around -30 of transcription start
PlantCARE_4476	TATA-box		TATATA	1234	6	-	Arabidopsis thaliana	core promoter element around -30 of transcription start
PlantCARE_4476	TATA-box		TATA	1236	4	-	Arabidopsis thaliana	core promoter element around -30 of transcription start
PlantCARE_4476	MYB recognition site		CCGTTG	707	6	-	Arabidopsis thaliana
PlantCARE_4476	GA-motif		ATAGATAA	1227	8	-	Arabidopsis thaliana	part of a light responsive element
