# Supplementary material for: CBF transcription factors involved in the cold response of Camellia japonica (Naidong)
Source: PeerJ. 2021 Sep 9;9:e12155. doi: 10.7717/peerj.12155 (PMC8435204; doi:10.7717/peerj.12155)
Supplement: Supplemental Information 9 [file peerj-09-12155-s009.xlsx]

## Sheet: Relative water content
control
1	13.5344
2	13.8212
3	13.7493
Fresh weight
CK			Drought
1	37.4643		1	13.5374
2	35.3398		2	14.8665
3	37.3978		3	13.0493
Dry weight
CK			Drought
1	25.4312		1	12.541
2	23.5343		2	13.6991
3	24.8216		3	12.0288
					Relative water content
	12.0331		0.9964		0.0828049		CK	1
	11.8055		1.1674		0.0988861		Drought	0.0876
	12.5762		1.0205		0.0811453
				mean	0.0876121
